# Supplementary material for: Pomegranate Extract Augments Energy Expenditure Counteracting the Metabolic Stress Associated with High-Fat-Diet-Induced Obesity
Source: MDPI journal article supplement (doi:10.3390/ijms231810460), 2022-09-09
Supplement: s1 [file s1]

**Supplementary Table S1.** Taqman probes used in the study

| GENE          | Probe         |
|---------------|---------------|
| <i>UCP1</i>   | Mm01244861_m1 |
| <i>CPT1a</i>  | Mm00550448_m1 |
| <i>SIRT1</i>  | Mm01168521_m1 |
| <i>PGC1a</i>  | Mm01208835_m1 |
| <i>PPARG</i>  | Mm00440940_m1 |
| <i>TFAM</i>   | Mm00447485_m1 |
| <i>PRDM16</i> | Mm00712556_m1 |
| <i>BMP8B</i>  | Mm00432115_g1 |
| <i>SREBF1</i> | Mm00550338_m1 |
| <i>AMPK</i>   | Mm01296700_m1 |
| <i>EPDR1</i>  | Mm07299958_m1 |
| <i>B2M</i>    | Mm00437762_m1 |
| <i>IL17RA</i> | Mm00434214_m1 |
| <i>IRS1</i>   | Mm01211875_m1 |
| <i>PFK</i>    | Mm01309576_m1 |
| <i>LDH</i>    | Mm00459144_m1 |
| <i>G6PDH</i>  | Mm00658204_s1 |
